# Supplementary material for: Spatial normalization for voxel-based lesion symptom mapping: impact of registration approaches
Source: Frontiers journal article supplement (doi:10.3389/fnins.2024.1296357), 2024-01-17
Supplement: Data_Sheet_1.PDF [file Data_Sheet_1.PDF]

## Supplementary Material

### SUPPLEMENTARY FIGURES

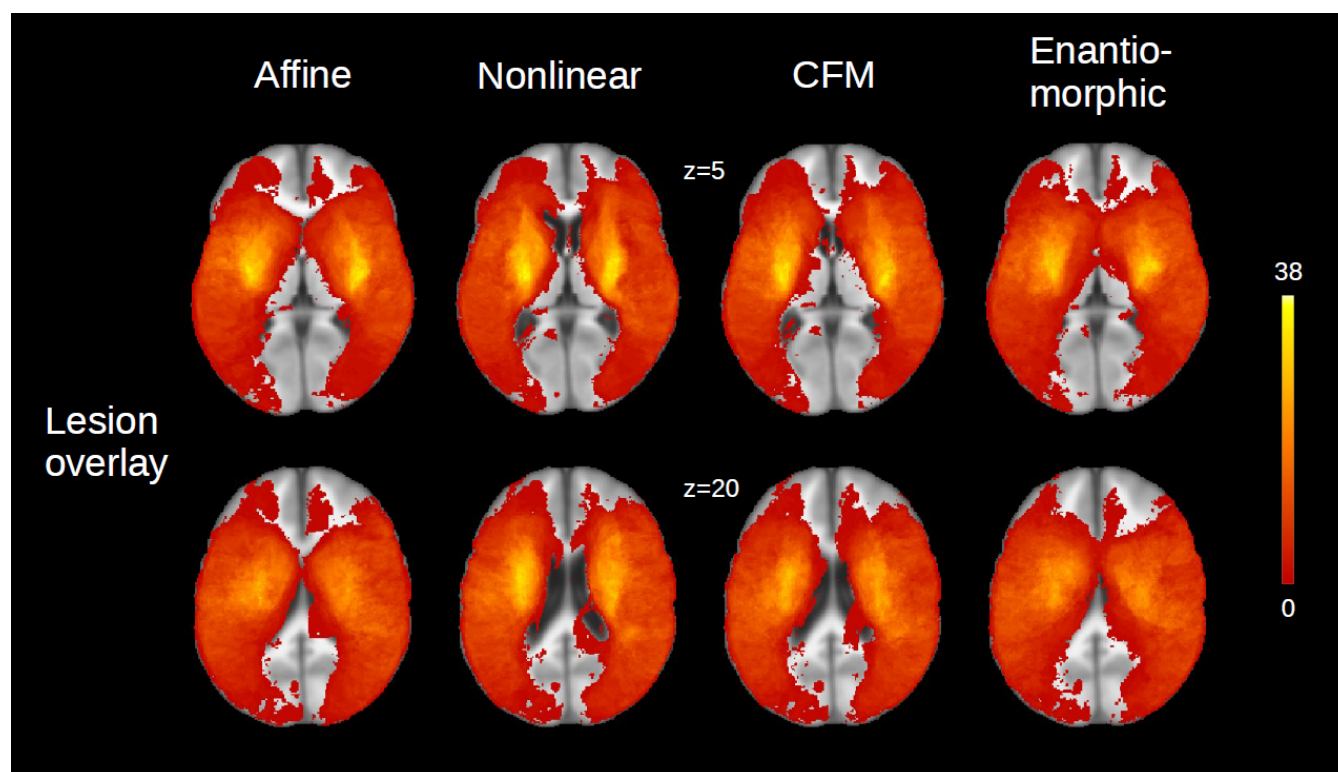

**Figure S1.** Overlay of the stroke lesions on days 2 to 3 after stroke onset from all patients (N=122; color bar: number of overlapping lesions). Similar to the top panel of Figure 3 of the main text, but without applying a lower threshold.
